RESEARCH ARTICLE

# Interspecific Hybridization in Pilot Whales and Asymmetric Genetic Introgression in Northern *Globicephala melas* under the Scenario of Global Warming

Laura Miralles<sup>1\*</sup>, Marc Oremus<sup>2</sup>, Mónica A. Silva<sup>3,4</sup>, Serge Planes<sup>5</sup>, Eva Garcia-Vazquez<sup>1</sup>

**1** Department of Functional Biology, University of Oviedo, 33006, Oviedo, Spain, **2** 16 rue Henri Niaoutou, 98800, Noumea, New Caledonia, **3** MARE—Marine and Environmental Sciences Centre and Centre of IMAR—Institute of Marine Research, University of the Azores, 9901–862, Horta, Portugal, **4** Biology Department, Woods Hole Oceanographic Institution, Woods Hole, MA, 02543, United States of America, **5** Laboratoire d'Excellence "CORAIL", Centre de Recherche Insulaire et Observatoire de l'Environnement (CRIOBE), USR 3278 CNRS-EPHE-UPVD, BP 1013 Papetoai, 98729, Moorea, Polynésie Française

\* [lml.miralles@gmail.com](mailto:lml.miralles@gmail.com)

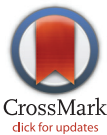

**OPEN ACCESS**

**Citation:** Miralles L, Oremus M, Silva MA, Planes S, Garcia-Vazquez E (2016) Interspecific Hybridization in Pilot Whales and Asymmetric Genetic Introgression in Northern *Globicephala melas* under the Scenario of Global Warming. PLoS ONE 11(8): e0160080. doi:10.1371/journal.pone.0160080

**Editor:** Pawel Michalak, Virginia Tech Virginia, UNITED STATES

**Received:** March 12, 2016

**Accepted:** July 6, 2016

**Published:** August 10, 2016

**Copyright:** © 2016 Miralles et al. This is an open access article distributed under the terms of the [Creative Commons Attribution License](https://creativecommons.org/licenses/by/4.0/), which permits unrestricted use, distribution, and reproduction in any medium, provided the original author and source are credited.

**Data Availability Statement:** D-Loop haplotypes are available in the GenBank database (<https://www.ncbi.nlm.nih.gov/genbank/>) under the accession numbers: KJ740360-KJ740387.

**Funding:** LM had a PCTI Grant from the Asturias Regional Government, referenced BP 10-004. MAS was supported by a 2013 FCT Investigator contract through POPH, QREN European Social Fund and the Portuguese Ministry for Science and Education. This study was also supported by a grant from the Principality of Asturias (reference: GRUPIN-2014-093). The funders had no role in study design, data

## Abstract

Pilot whales are two cetacean species (*Globicephala melas* and *G. macrorhynchus*) whose distributions are correlated with water temperature and partially overlap in some areas like the North Atlantic Ocean. In the context of global warming, distribution range shifts are expected to occur in species affected by temperature. Consequently, a northward displacement of the tropical pilot whale *G. macrorhynchus* is expected, eventually leading to increased secondary contact areas and opportunities for interspecific hybridization. Here, we describe genetic evidences of recurrent hybridization between pilot whales in northeast Atlantic Ocean. Based on mitochondrial DNA sequences and microsatellite loci, asymmetric introgression of *G. macrorhynchus* genes into *G. melas* was observed. For the latter species, a significant correlation was found between historical population growth rate estimates and paleotemperature oscillations. Introgressive hybridization, current temperature increases and lower genetic variation in *G. melas* suggest that this species could be at risk in its northern range. Under increasing environmental and human-mediated stressors in the North Atlantic Ocean, it seems recommendable to develop a conservation program for *G. melas*.

## Introduction

Global environmental changes, including temperature increase, glacial ice melting and sea level rising, are intense in the northern latitudes where they are reshaping the fragile local ecosystems with potentially devastating consequences for vulnerable species [1]. Amongst other consequences of global change, a general increase of interspecific hybridization is predicted in Polar and subpolar zones due to the loss of temperature barriers [2] and the arrival of new

collection and analysis, decision to publish, or preparation of the manuscript.

**Competing Interests:** The authors have declared that no competing interests exist.

species displaced from warmer zones. Although introgressive hybridization occurs rarely in nature [3], it is more frequent in fast-changing ecosystems. Species may alter their mate choice under altered or adverse conditions, subsequently acquiring new genetic variation [4]. Interspecific hybridization is especially scarce in mammals [5]; the exception is cetaceans for which many hybrids occur e.g. [6, 7], not only between species within a genus but also between different genera [8]. Cetacean species experiencing distribution shifts could be good models to test Kelly et al. [2] prediction of an increase of hybridization caused by global warming.

Long-finned (*Globicephala melas*) and short-finned (*Globicephala macrorhynchus*) pilot whales are two sympatric cetaceans of Delphinidae, a family under recent speciation [9, 10] and a controversial number of species [11, 12]. Based on osteological data, Van Bree [13] demonstrated that pilot whales are two clearly distinct species, which was later supported by molecular phylogenetic studies [9, 14, 15]. Predicted impacts of global climate change on the marine environment may induce changes in pilot whales species range, abundance and/or migration patterns [16, 17]. The distribution of *G. melas* is correlated with sea surface temperature [18–21]. Moreover, at the northern limits of its range, *G. melas* abundance is also correlated with the North Atlantic climate oscillation [21–23]. *G. macrorhynchus* also seems to be affected by climate variations [24, 25]. On the other hand, pilot whale distribution is primarily associated with prey abundance (e.g. [20, 24, 26, 27]), which in turn is also influenced by temperature [21, 25, 28].

The genetic identification of one post-F1 hybrid pilot whale in the Northeast Atlantic Ocean [29] demonstrated that *G. melas* and *G. macrorhynchus* are able to hybridize successfully. Twenty years before this finding, a Faeroese study [30] reported clines of external morphological traits of pilot whales, instead of clear diagnostic features: 2.7% of *G. melas* off the Faeroe Islands exhibited morphometric traits typical of *G. macrorhynchus*. This scenario makes the Northeastern Atlantic pilot whales a good model for investigating the association between climate change and interspecific hybridization in cold-temperate latitudes. We analysed information from different disciplines to infer the effect of global climate change on the sympatric distribution of *G. melas* and *G. macrorhynchus* at the northernmost limit of their range. Microsatellite markers with species-specific alleles and coalescent demographic reconstructions from DNA sequences were combined with oceanographic data and paleo-temperature reconstructions, for tracing the evolutionary history of these species. The departure hypothesis was that climate warming alterations could promote population genetic alterations (like population size reduction, interspecific hybridization, etc.) in pilot whales from the colder waters of North Atlantic regions.

## Material and Methods

### Oceanographic and temperature reconstructions

GISS temperature analysis [31, 32] was used to calculate trends in annual temperature change from 1914 to 2014. We also estimated changes in sea surface temperature (SST) per month during the 1980–2015 period, and the seasonal mean SST anomalies per year at all latitudes from 1988 to 2013 using the database SST-Hadley/Reynols. All estimations were calibrated with a base period from 1951 to 1980 [31].

Climate reconstruction focused on the known reproduction seasons of North Atlantic pilot whales: May–October for *G. melas* [33, 34] and July–August for *G. macrorhynchus* [35].

For paleoclimatic reconstructions, temperatures were obtained from Marcott et al. [36]. We used the core MD95–2015 with the proxy UK'37, calibrated with Müller et al. [37] for marine ages of North Atlantic annual temperatures [38].

## Pilot whale samples

A total of 151 samples of the two pilot whale species were collected from four different locations between 1997 and 2012 (Faeroe Islands, coasts of the Iberian Peninsula, Azores Islands and Canary Islands). A vicariant population outgroup of *G. macrorhynchus* was obtained from French Polynesia, Pacific Ocean. Tissue samples were taken from stranded animals, biopsies and museum collections. An attempt was made to avoid sampling more than one member from the same family group. No animal was injured or killed for this study. All protocols and analyses were approved by the Committee of Ethics of the University of Oviedo. We obtained the CITES permit (ESBI00001/12I) and all the permissions from the Faroese Museum of Natural History to bring the Faroese samples to Spain, as well as French Polynesian samples (CITES permit 13NZ000012; original permit number FR-02-987-0083-E).

## Genetic analysis

DNA was extracted employing a Chelex-based protocol [39]. The mitochondrial control region (D-loop) was amplified following Oremus et al. [15]. Sequences were edited and aligned using ClustalW [40] from the BioEdit Sequence Alignment Editor [41]. NCBI-BLAST [42] online software was employed for species identification. The number of haplotypes, haplotypic and nucleotidic diversities were calculated with DNAsp v5 [43]. A median-joining [44] haplotype network was constructed to visualize the relationships among the different mitochondrial haplotypes, and their frequencies, in the sampled populations with the program Network 4.5.1.6 [45]. Network software reconstructs all possible, shortest, least complex phylogenetic trees (maximum parsimony) from a given dataset using different algorithms.

Eight microsatellite loci (EV37MN; EV94MN; 199/200; 415/416, 417/418, 409/470; 468/469 and 464/465) were amplified as in Fullard et al. [20]. A multi-tube method [46] was employed to validate the allele scores. Each microsatellite locus was individually amplified three times in three different thermal cycler machines (Applied Biosystems 2720 Thermal Cycler). Microsatellites were genotyped employing GeneMapper® Software Version 4.0 (Applied Biosystems). Scoring errors, large allele dropout and null alleles were tested employing the program MICROCHECKER [47].

Samples with positive amplification for all mitochondrial and microsatellite loci were sexed by amplifying the Y-linked SRY gene [48], typical of males. PCR was run with positive and negative controls to avoid possible errors. PCR products were run and visualized in 2% agarose gel.

## Population genetics

Conformity with Hardy-Weinberg equilibrium was calculated using the exact probability test with GENEPOP software [49] and Bonferroni corrections. Microsatellite variation (number of alleles per locus, allelic richness and observed and expected heterozygosity) was calculated with the programs GENETIX Version 4.03 [50] and FSTAT Version 2.9.3.2 [51]. Genetic divergence between populations was estimated using population pairwise  $F_{ST}$  values obtained with Arlequin version 3.0 [52]. To detect recent bottleneck events we employed the software BOTTLENECK version 1.2.02 [53] with default settings.

## Evolutionary and demographic inferences

Population divergence time estimations were computed under a Bayesian Markov Chain Monte Carlo (MCMC) framework using BEAST version 1.6.1 [54]. Following a burn-in of 5 million cycles, rates were sampled once every 1 000 cycles from 50 million MCMC steps for an

Extended Bayesian Skyline tree, with a stepwise model for mitochondrial DNA and an evolution rate of 1.5% per million years [55–57]. Bayesian intraspecific phylogenies are based on coalescent theory [58] and allow the inference of past population dynamics and parameters from contemporary gene sequences. The best evolution model and its priors ( $\kappa$ , gamma-shape, proportion of invariant sites, etc.) were defined by jModeltest software version 0.1.1 [59] using the Akaike information criterion [60]. Tracer version 1.5 [54] was used to check chains had converged to a stationary distribution.

## Interspecific genetic relationships

The software STRUCTURE v.2.3.1 [61] was employed for estimating the membership of each individual to each species ( $K = 2$ ; two expected genetic units) under the “Admixture model” which assumes that individuals may have mixed ancestry. Settings were a burn-in period of 70000 steps followed by 700000 MCMC iterations and seven runs. Since there is no clear consensus about the proportion of membership that indicates introgression [62], for conservative interpretation we have considered  $>25\%$  as a threshold for significant introgression [29]. Confidence intervals of 95% were calculated for all membership values. The software NewHybrids [62] was run for identifying individuals of each pure species, hybrids of first and second generation and backcrosses. An initial run was implemented for only pure species individuals with  $>0.980$  membership detected from STRUCTURE, in order to assess the discrimination power of our dataset in NewHybrids. A second run was done for 10 hypothetical F1 hybrids and pure species. Then, the MCMC was run for 500000 iterations after a burn-in period of 50000 iterations for our original data set.

Gene flow between species in the North Atlantic Ocean was estimated with MIGRATE 3.0 [63] from  $\Theta = xN_e\mu$  and  $M = m/\mu$  ( $x$ , inheritance parameter;  $N_e$ , effective size;  $m$ , immigration rate;  $\mu$ , mutation rate) in each species based on coalescent theory [64] and relaxing the original assumption of Wright [65]. If  $\Theta$  and  $M$  are multiplied together, the number of immigrants per generation can be calculated as gene flow. We used this formula, employing the inheritance parameter  $x$  ( $x = 4$  for nuclear DNA [here microsatellite loci] and 1 for mtDNA sequences), to calculate the effective number of immigrants per generation for nuclear and mitochondrial DNA separately. To be sure that results do not reflect spurious local likelihood peaks, three independent runs were performed with a Bayesian approximation to ensure final chains were estimating the same value of Theta ( $\Theta$ ), burn-in of 500000, fifteen long chains (50000 recorded steps with increment of 100) and five replicates. Gene flow between species was also calculated from microsatellite data using the private alleles method implemented in GENEPOP [49].

## Results

### Temperature reconstructions

Temperature increased globally in the last hundred years (Fig 1A), especially in the Northeast Atlantic Ocean for the last decades (Fig 1B). Air temperature increased there two Celsius degrees between 1984 and 2014. Focusing on sea surface temperature (SST) anomalies, water temperature increased up to 2.4°C in the last ten years (Fig 2A). The increase in SST was greater in the northern latitudes (Fig 2A and 2B). There, the SST warming was more intense during summer months (Fig 2B), coincident with the reproduction season of pilot whales. Furthermore, at this time of the year the SST warming affected a wider area from 30°N to the northernmost latitude. This temperature increase may favour the northward expansion of *G. macrorhynchus*, thereby promoting the overlap in distribution between the two species during the reproduction season. This coincidence provides the climate context for further results on population genetics of these species.

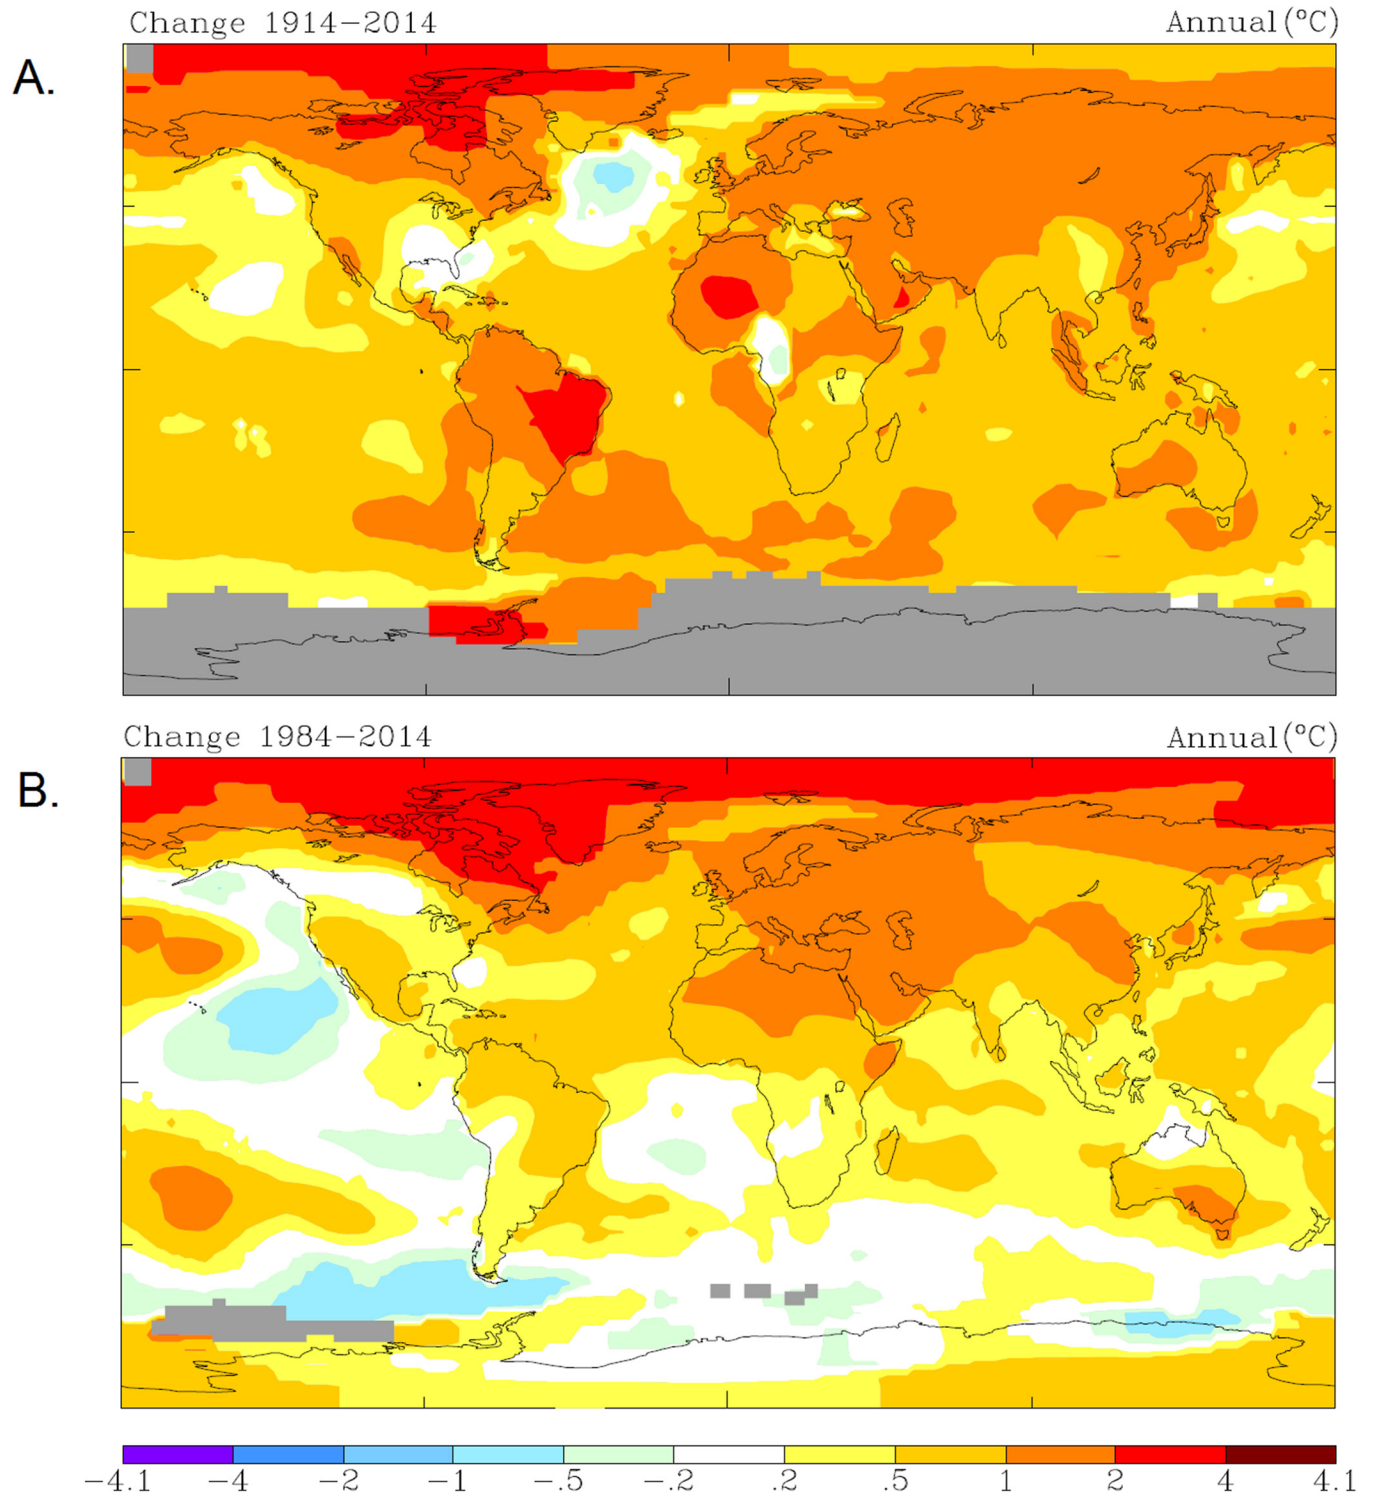

**Fig 1. Global temperature changes.** A. GISS surface temperature analysis [32] taken from NASA by using annual temperature change trends from 1914 to 2014 and calibrated with a base period from 1951 to 1980. B. GISS surface temperature analysis [32] taken from NASA by using annual temperature change trends from 1984 to 2014 and calibrated with a base period from 1951 to 1980. Gray color means data missing.

doi:10.1371/journal.pone.0160080.g001



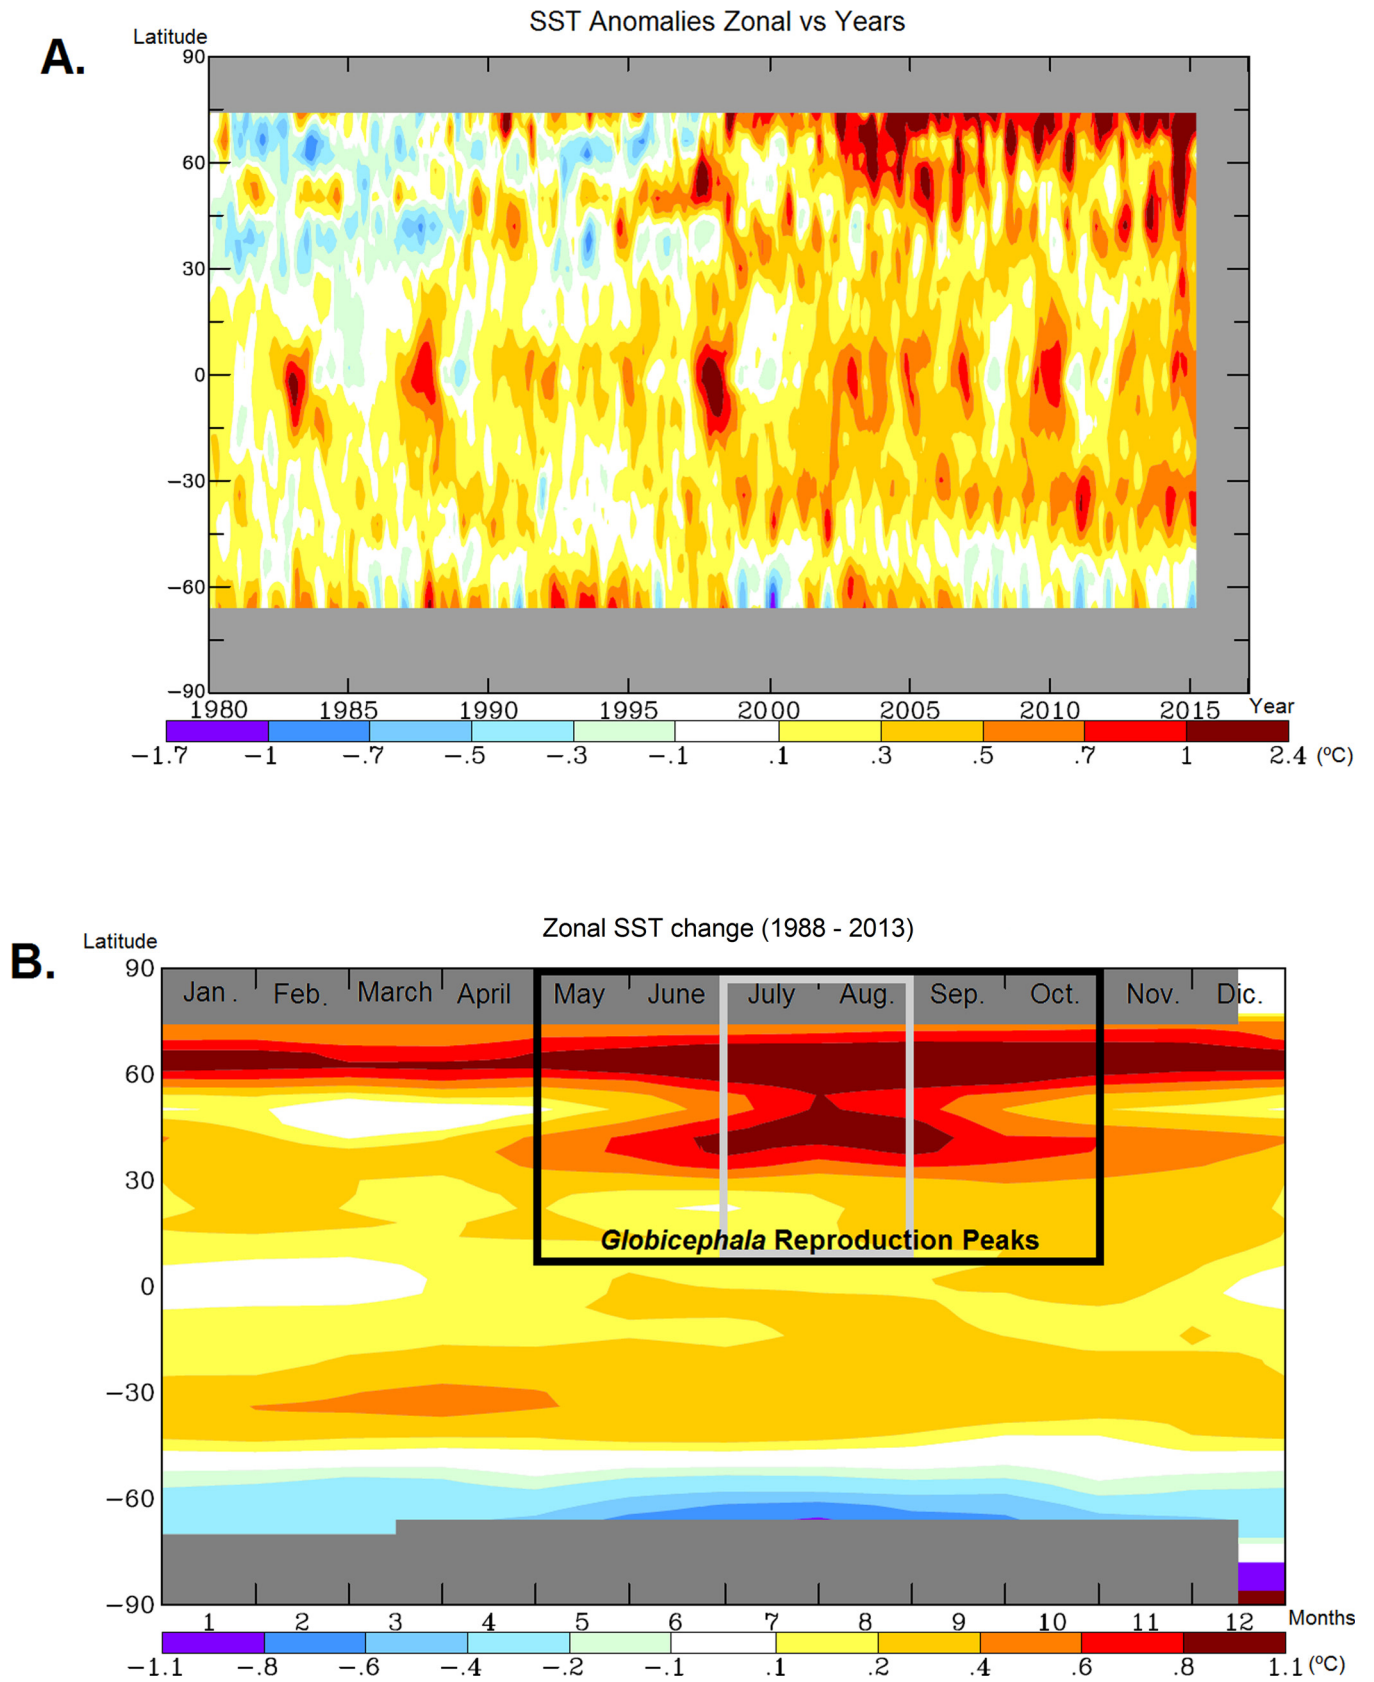

**Fig 2. Sea surface temperature (SST).** A. SST anomalies represented by zonal means versus years from 1980 to 2015. Data base: Sea Surface Temperatures (°C)—Hadley/Reynolds. Base period: 1951–1980. GISS surface temperature analysis [32]. B. SST change represented by zonal means from 1988 to 2013 versus Months. Data base: Sea Surface Temperatures (°C)—Hadley/Reynolds. Base period: 1951–1980. GISS surface temperature analysis [32]. Reproduction seasons are represented with a black square for *Globicephala melas* and a grey square for *G. macrorhynchus*.

doi:10.1371/journal.pone.0160080.g002

## Population genetics

A total of 120 DNA samples provided positive PCR amplification for all mitochondrial and nuclear genetic markers considered. These samples were genetically sexed. More males than females were analyzed for the two species (Table 1): 32 males versus 31 females for *G. macrorhynchus* and 50 males versus 7 females for *G. melas*.

Twenty eight D-Loop haplotypes of 703 base pairs (bp) were found. They are available in GenBank database (<https://www.ncbi.nlm.nih.gov/genbank/>) under the accession numbers KJ740360-KJ740387. High haplotype diversity and low nucleotide diversity were found in both species but *G. melas* had lower haplotype and nucleotide diversities, as well as lower number of haplotypes and lower theta values (Table 1) than *G. macrorhynchus*.

Two microsatellite loci (EV94MN and 468/469) might exhibit possible null alleles (detected with MICROCHECKER) and were discarded from further analyses. Null alleles and scoring errors were not detected for six microsatellite loci. Linkage disequilibrium was not significant and none of these loci deviated significantly from Hardy-Weinberg equilibrium, thus they were used in further population analysis. The six loci were very variable (S1 Table). Species-specific alleles were present in all loci (except EV37NM and 415/416 for the species *G. melas*; S1 Table) and allowed identification of interspecific hybrids. No significant differences between expected and observed heterozygosities were detected, and low  $F_{IS}$  values were found (S1 Table).

*G. melas* and *G. macrorhynchus* were unambiguously differentiated in the haplotype network (Fig 3), with 10 different mutations and two inferred haplotypes between them. For the two species the haplotype network exhibited a star-like shape that may indicate recent population expansion [66]. No genetic population differentiation was found in *G. melas*, neither in *G. macrorhynchus* for Atlantic Ocean samples (S2 Table). Recent bottlenecks were not detected for any *Globicephala* species in this study.

## Interspecific genetic relationships

Hybridization and introgression were detected from the analyzed microsatellite loci (Fig 4), which had a high discrimination power in STRUCTURE (99.8%) and NewHybrids (98.4%). Four post-F1 hybrids were identified (Fig 4; Table 2) in *G. melas* while none was found in *G. macrorhynchus* samples. Three of the four hybrids (Table 2) originated from crosses between *G. melas* females and *G. macrorhynchus* males, as deduced from their mitochondrial DNA *G. melas*-type. The other hybrid was morphologically identified as *G. melas*, and genetically assigned to *G. melas* from nuclear markers, but had *G. macrorhynchus*-type mitochondrial DNA. This evident morphological and nuclear-mitochondrial discordance can be caused by repeated backcrosses of a hybrid issued from a cross [*G. macrorhynchus* female x *G. melas* male] to *G. melas*. These findings demonstrate that introgression is asymmetrical, with the genome of *G. macrorhynchus* entering into *G. melas* genome and not in the opposite direction. In the studied population, hybrids represented 7.02% of *G. melas* individuals with an average of 6.2% introgressed membership estimated from STRUCTURE (Fig 4; Table 2). The number of alleles in *G. melas* was indeed higher when hybrids were included in the dataset (45 alleles; Table 1) than when they were not (39 alleles; S1 Table).

**Table 1. Genetic diversity for each species and location.**

| Species                        | Localities        | Sex       |               | D-LOOP    |              |              | Microsatellite loci     |           |               |              |              |
|--------------------------------|-------------------|-----------|---------------|-----------|--------------|--------------|-------------------------|-----------|---------------|--------------|--------------|
|                                |                   | N         | (M: F)        | Nh        | Hd           | ( $\pi$ )    | $\Theta$ (= $N_e \mu$ ) | NA        | AR            | He           | Ho           |
| <b><i>G. macrorhynchus</i></b> |                   | <b>62</b> | <b>32: 30</b> | <b>16</b> | <b>0.667</b> | <b>0.002</b> |                         | <b>64</b> | <b>62.690</b> | <b>0.828</b> | <b>0.779</b> |
|                                | Azores Islands    | 16        | 14: 2         | 4         | 0.517        | 0.001        | 0.0022                  | 45        | 28.200        | 0.822        | 0.783        |
|                                | Canary Islands    | 26        | 14: 12        | 11        | 0.697        | 0.002        | 0.0101                  | 50        | 27.299        | 0.806        | 0.804        |
|                                | French Polynesia  | 20        | 4: 16         | 3         | 0.582        | 0.001        | 0.0007                  | 44        | 26.003        | 0.776        | 0.782        |
| <b><i>G. melas</i></b>         |                   | <b>57</b> | <b>50: 7</b>  | <b>12</b> | <b>0.474</b> | <b>0.001</b> |                         | <b>45</b> | <b>44.268</b> | <b>0.644</b> | <b>0.616</b> |
|                                | Faeroe Islands    | 50        | 48: 2         | 9         | 0.263        | 0.001        | 0.0029                  | 41        | 20.389        | 0.644        | 0.617        |
|                                | Iberian Peninsula | 7*        | 2: 5          | 6         | 0.928        | 0.003        | 0.0044                  | 21        | 17.680        | 0.603        | 0.525        |

\*The only *G. macrorhynchus* individual from the Iberian Peninsula was not taken into account for these calculations.

N: sample size; M: Male; F: Female; Nh, Number of haplotypes; Hd, Haplotype diversity; ( $\pi$ ), Nucleotide diversity;  $\Theta$  (=  $N_e \mu$ ), theta is equal to the effective population size ( $N_e$ ) times the mutation rate of the species per site per generation ( $\mu$ ). NA, Number of alleles per locus. AR, allelic richness. He and Ho, heterozygosity observed and expected respectively

doi:10.1371/journal.pone.0160080.t001

A high interspecific genetic interchange between species, measured as effective immigrants, was obtained from two different statistical approaches. Based on private alleles and microsatellite data, the interchange between species was estimated at 1.131 individuals per generation. From a coalescence method and mitochondrial sequences, interspecific gene flow was estimated at 0.429 individuals per generation. It increased to 1.463 individuals per generation when employing microsatellite data with *G. melas* being always the receptor species.

### Coalescent evolutionary and demographic inferences

The divergence time between pilot whale species was estimated to occur about 648 500 years ago (standard deviation = 4817.4 years; 95% Highest Posterior Density = 363 600–961 900). A reconstruction of historical population growth of both species revealed a very pronounced peak in *G. macrorhynchus* growth rate between 30 000–40 000 years ago. After this point, the growth rate of *G. macrorhynchus* decreased rapidly, remaining below that of *G. melas*. In the last 10 000 years, the situation changed for *G. melas* that suffered a drastic decrease in growth rates and reaching values lower than those of *G. macrorhynchus* (Fig 5). Historical growth rate of *G. melas* in this later period seems to match historical temperature anomalies (Fig 5) during the Holocene (starting 11000 years ago), following the last glacial period in late Pleistocene (30000–25000 years ago). Significant polynomial regressions were found between Holocene paleotemperatures and historical growth rate of the two species, stronger for *G. melas* ( $R^2 = 0.9187$ ) than for *G. macrorhynchus* ( $R^2 = 0.7799$ ).

### Discussion

This is the first report of genetic admixture and interactions between pilot whale species promoted by distribution shifts that might be caused by global temperature warming. These results may be extended to other cetacean species, since shifts in distribution ranges resulting from climate warming are expected to occur in many cetaceans e.g. [16, 17, 67]. However, since the results of this study are based on correlational inferences and the period considered is relatively long, an alternative scenario of continuous limited admixture between species regardless of climate changes may also be possible.

Previous studies have reported the strong relationship between sea surface temperature (SST) and pilot whale distribution, migration and abundance [16, 18–24, 26–28, 68]. Water temperature increased significantly in the last decades (Figs 1 and 2). Along with temperature,



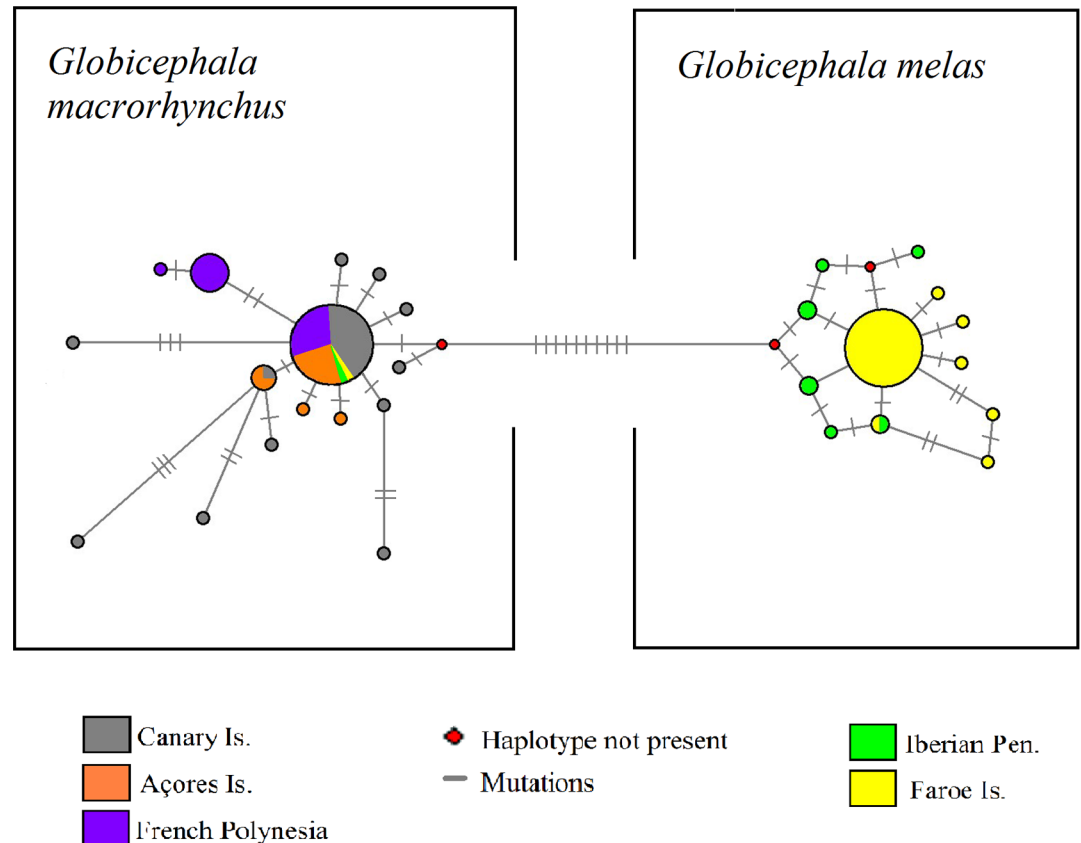

**Fig 3. Mitochondrial haplotypes network.** Median-Joining network representing the relationships among D-loop mitochondrial haplotypes. Circle sizes are proportional to the frequency of each haplotype. Different locations are represented in different colors. Each species is clustered in a square. Mutations are represented as perpendicular bars in the branches. Inferred haplotypes not present in the dataset are symbolized with a small red circle.

doi:10.1371/journal.pone.0160080.g003

the distribution limit of *Globicephala macrorhynchus* in the Northeast Atlantic shifted 3° latitude in only two decades. In 1988 it was described in the western edge of the Cantabrian Sea within Spanish waters at 43°36' N [69], while in 2010 it occurs in Charente-Maritime in France at 46°06' N [70]. Moreover, strandings of this species (confirmed by genetic analyses) have been recently reported in this area of France providing another unequivocal signal of the northward displacement of this species [71, 72]. Climate change could therefore facilitate mating between *G. macrorhynchus* and *G. melas* by widening the area of co-occurrence of the two species, especially during the reproductive peaks in summer (Fig 2B). In the North Atlantic Ocean, reproduction happens during the warmer months and the observation of larger groups coincides with a higher proportion of mixed pods [73–74]. The warmer SST anomalies in the last decades in northern latitudes (Fig 2) are particularly intense and coincide with the reproduction season of *Globicephala* (Fig 2B). The increase in water temperature during mating season (Fig 2B) facilitates northward incursions of *G. macrorhynchus*, and therefore may have increased opportunities for interspecific mating between pilot whales.

A process of introgressive hybridization is happening in Northeast Atlantic *G. melas*. Nuclear genetic markers revealed only unidirectional introgression of *G. macrorhynchus* DNA into *G. melas* genome. Between-species gene flow estimates were higher for microsatellites (1.14–1.46 individuals per generation) than for mitochondrial DNA (0.43 individuals per

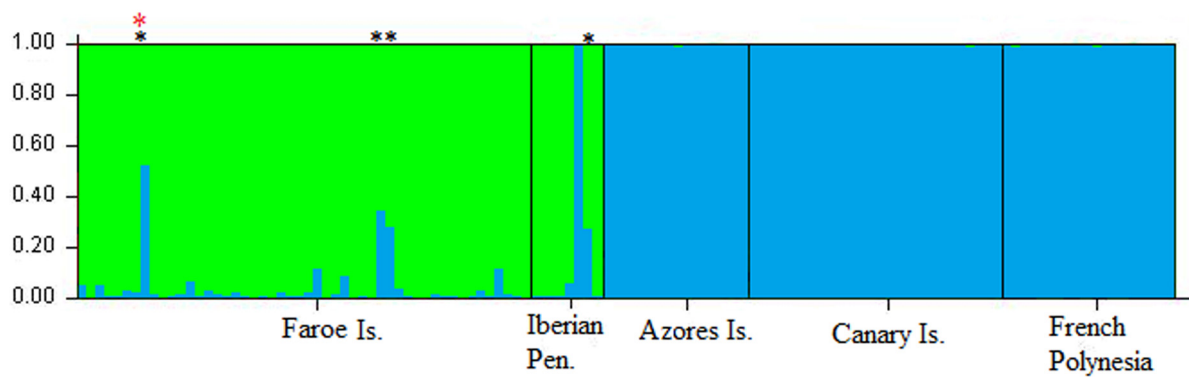

**Fig 4. Genetic introgression in *Globicephala* species.** Introgression detected with STRUCTURE 2.3.1 software and represented as membership of each *Globicephala* species. Each bar represents one individual and each color means one species: green for *G. melas* and blue for *G. macrorhynchus*. Hybrids are indicated with a black asterisk and the nuclear-mitochondrial discordant with a red asterisk. Sampling locations are indicated below the graph.

doi:10.1371/journal.pone.0160080.g004

generation), as it was also reported for intraspecific gene flow in pilot whales [75]. The high level of introgression found in this study, quite uncommon for mammal species, might be explained by a recent species divergence. The divergence time between the two pilot whales was estimated about 648500 ( $\pm$  5000) years ago. This is a very recent split from the last common ancestor and would explain the relative permeability of interspecific reproductive barriers [76–78].

Hybridization is more frequent in areas where population density is low and where species are near the edge of their ecological range [79]. This could be the case of *Globicephala* in their northernmost distribution area. Lower population variation suggests reduced population size of *G. melas* in comparison with *G. macrorhynchus*. Differential selection and other possible factors may explain this difference between species [80, 81]. Bottlenecks and genetic or cultural hitchhiking also leave similar footprints in DNA [15, 82]. Although we did not detect any recent bottleneck event in *G. melas* from our analysis, matrilineal social structure together with high mortality can reduce mitochondrial DNA diversity [81]. This could explain reduced diversity in *G. melas* since this species has been and continues to be hunted. Climate warming has accelerated in recent decades, and it is possible that the population reduction is too recent

**Table 2. Hybridization in Pilot whales.**

|                         | New Hybrids 1.0 |          |          | STRUCTURE 2.3.1     |                     |
|-------------------------|-----------------|----------|----------|---------------------|---------------------|
|                         | Hybrid          | Pure GME | Pure GMA | Memb.GME            | Memb.GMA            |
| <i>G. macrorhynchus</i> | 0               | 0.000    | 0.985    | 0.003 (0.002–0.004) | 0.996 (0.995–0.997) |
| <i>G. melas</i>         | 4               | 0.966    | 0.000    | 0.937 (0.902–0.972) | 0.062 (0.027–0.097) |
| All 4 hybrids           | 4               | 0.665    | 0.000    | 0.629 (0.518–0.740) | 0.371 (0.260–0.482) |
| Hybrid F 07             | F2 GME          | 0.524    | 0.000    | 0.465 (0.354–0.576) | 0.535 (0.424–0.646) |
| Hybrid F 12             | Bx GME          | 0.711    | 0.000    | 0.650 (0.539–0.761) | 0.350 (0.239–0.461) |
| Hybrid F 33             | Bx GME          | 0.671    | 0.000    | 0.742 (0.631–0.853) | 0.258 (0.147–0.369) |
| Hybrid IP 53            | F2 GME          | 0.752    | 0.000    | 0.674 (0.563–0.785) | 0.326 (0.215–0.437) |

Hybridization scores in proportions per species, per introgressed individuals and for each descendent of hybrid calculated with two different methods (NewHybrids 1.0 and STRUCTURE 2.3.1 software) STRUCTURE confidence intervals (95%) are included in brackets. GME: *Globicephala melas*; GMA: *Globicephala macrorhynchus*; Memb.: Membership; F: Feroe Islands; IP: Iberian Peninsula; F2: second generation; Bx: Backcrossing.

doi:10.1371/journal.pone.0160080.t002

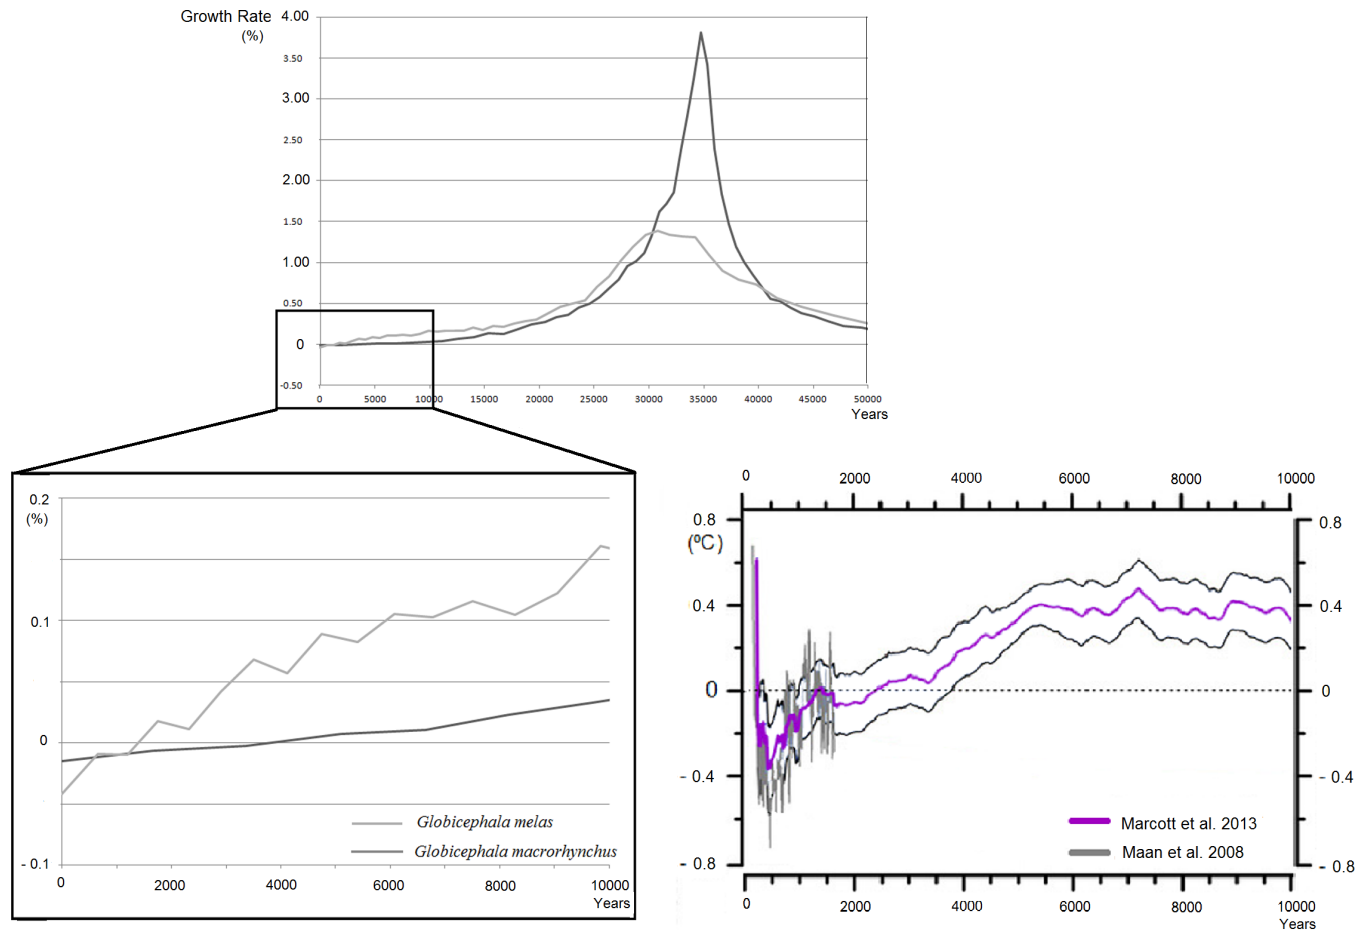

**Fig 5. Pilot whale historical growth rates.** Reconstruction of the historical growth rates of both pilot whale species. The graph at the left side of the bottom shows the growth rates during the last 10000 years. *G. macrorhynchus* is represented in dark grey and *G. melas* is in light grey. The graph at the right side of the bottom represents the global temperature anomalies over the past 10000 years compared to historic average (1961–1990), this image is adapted from Marcott et al. [36]

doi:10.1371/journal.pone.0160080.g005

for detecting significant genetic evidence of bottlenecks. Another possible explanation would be a sustained population decline over a long period, which is not viewed as a bottleneck. Our reconstruction of historical population growth rates suggests that North Atlantic *G. melas* has been declining since the last glacial period in the late Pleistocene (30000–25000 years ago), and more intensely during the Holocene when population growth became negative (Fig 5). The intense warming that occurred throughout the Holocene (e.g. [83]) could have contributed to *G. melas* decline, as suggested by the correlation between temperature anomalies and the historical population growth rate of this species.

As a final remark, historical and present population reductions, global warming, climate change and other possible factors, like human-mediated stressors such as marine traffic or cultural hunts, seem to negatively affect *G. melas*. An uncertain future is waiting for this species under climate change and global warming scenarios. *G. melas* could disappear from the North-east Atlantic Ocean, as it has already disappeared from the North Pacific, about 800–1200 years ago in Japan [84] and 3500–2500 years ago in Alaska [85]. To preserve *G. melas* in northern latitudes it seems advisable to develop a monitoring program and implement a conservation plan for this species.

## Supporting Information

**S1 Table. Microsatellite variation for each species (without suspected hybrids).** NA: Number of Alleles; AR: Allele Range; EA: Exclusive Alleles; He: Expected heterozygosity; Ho: Observed heterozygosity; FIS: Inbreeding coefficient; HWE: p-value of Hardy-Weinberg equilibrium (no-significant values after Bonferroni correction).

(DOCX)

**S2 Table. Microsatellite and mtDNA population genetic distances ( $F_{ST}$ ) without suspected hybrids.** Pairwise  $F_{ST}$  estimates based on mtDNA (below diagonal) and microsatellite loci (above diagonal). Significant P values are in bold. GME: *Globicephala melas*; GMA: *G. macro-rhynchus*.

(DOCX)

## Acknowledgments

We want to thank B. Mikkelsen from the Feroese Museum of Natural History for the Feroese samples; S. Lens from IEO Vigo, A. Rodriguez-Folgar from GREMMAR and C. Fernandez Maldonado from *Agencia de Medio Ambiente y Agua de la Junta de Andalucía* for the Iberian Peninsula samples; M. Carrillo from Canarias Conservación for the Canary Island samples, A. Benet, M. Poole and S. Baker for the Polynesian samples, and project MAPCET-M2.1.2/F/012/2011 [FEDER, the Competitiveness Factors Operational (COMPETE), QREN European Social Fund, and Proconvergencia Açores/EU Program] for Azorean samples. This is a contribution of the Marine Observatory of Asturias (OMA). The authors declare that none of the authors have any competing interests.

## Author Contributions

Conceived and designed the experiments: EG LM. Performed the experiments: LM. Analyzed the data: LM. Contributed reagents/materials/analysis tools: MO MS SP. Wrote the paper: LM MO MS SP EG. Sampling: LM MO MS SP.

## References

1. Edwards CJ, Suchard MA, Lemey P, Welch JJ, Barnes I, Fulton TL et al. Ancient Hybridization and an Irish Origin for the Modern Polar Bear Matriline. *Curr Biol*. 2011; 21: 1251–1258. doi: [10.1016/j.cub.2011.05.058](https://doi.org/10.1016/j.cub.2011.05.058) PMID: [21737280](https://pubmed.ncbi.nlm.nih.gov/21737280/)
2. Kelly B, Whiteley A, Tallmon D. The Arctic melting pot. *Nature* 2010; 891: 468.
3. Mallet J. Hybridization, ecological races and the nature of species: empirical evidence for the ease of speciation. *Phil Trans R Soc B*. 2008; 363: 2971–2986. doi: [10.1098/rstb.2008.0081](https://doi.org/10.1098/rstb.2008.0081) PMID: [18579473](https://pubmed.ncbi.nlm.nih.gov/18579473/)
4. Seehausen O, Takimoto G, Roy D, Jokela J. Speciation reversal and biodiversity dynamics with hybridization in changing environments. *Mol Ecol*. 2008; 17: 30–44. PMID: [18034800](https://pubmed.ncbi.nlm.nih.gov/18034800/)
5. Larsen PA, Marchán-Rivadeneira MR, Baker RJ. Natural hybridization generates mammalian lineage with species characteristics. *Proc Natl Acad Sci USA*. 2010; 107(25): 11447–11452. doi: [10.1073/pnas.1000133107](https://doi.org/10.1073/pnas.1000133107) PMID: [20534512](https://pubmed.ncbi.nlm.nih.gov/20534512/)
6. Willis PM, Crespi BJ, Dill LM, Baird RW, Hanson MB. Natural hybridization between Dall's porpoises (*Phocoenoides dalli*) and harbour porpoises (*Phocoena phocoena*) *Can J Zool*. 2004; 82: 828–834.
7. Glover KA, Kanda N, Haug T, Pastene LA, Øien N, Seliussen BB et al. Hybrids between common and Antarctic minke whales are fertile and can back-cross. *BMC Genet*. 2013; 14: 25–36. doi: [10.1186/1471-2156-14-25](https://doi.org/10.1186/1471-2156-14-25) PMID: [23586609](https://pubmed.ncbi.nlm.nih.gov/23586609/)
8. Berube M, Aguilar A. A new hybrid between a blue whale, *Balaenoptera musculus*, and a fin whale, *B. physalus*: Frequency and implications of hybridization. *Mar Mamm Sci*. 1998; 14(1): 82–98.
9. LeDuc RG, Perrin WF, Dizon AE. Phylogenetic relationships among the delphinid cetaceans based on full cytochrome b sequences. *Mar Mamm Sci*. 1999; 15: 619–648.

10. McGowen MR, Spaulding M, Gatesy J. Divergence date estimation and a comprehensive molecular tree of extant cetaceans. *Mol Phyl Evol.* 2009; 53: 891–906.
11. Caballero S, Jackson J, Mignucci-Giannoni A, Barrios-Garrido H, Beltrán-Pedrerros S, Montiel-Villalobos MA et al. Molecular systematic of South American dolphins *Sotalia*: Sister taxa determination and phylogenetic relationships, with insights into a multi-locus phylogeny of the Delphinidae. *Mol Phyl Evol.* 2008; 46: 252–268.
12. Slater GJ, Price SA, Santini F, Alfaro ME. Diversity versus disparity and the radiation of modern cetaceans. *Proc R Soc B: Biol Sci.* 2010; 277: 3097–3104.
13. Van Bree PHJ. On *Globicephala sieboldii* Gray, 1846, and other species of pilot whales (Notes on Cetacea, Delphinidoidea III). *Beaufortia* 1971; 19(249): 79–87.
14. May-Collado L, Agnarsson I. Cytochrome b and Bayesian inference of whale phylogeny. *Mol Phyl Evol.* 2006; 38: 344–354.
15. Oremus M, Gales R, Dalebout M, Funahashi N, Endo T, Kage T et al. Worldwide mtDNA diversity and phylogeography of pilot whales (*Globicephala* spp.). *Biol J Linn Soc.* 2009; 98: 729–744.
16. Learmonth JA, MacLeod CD, Santos MB, Pierce GJ, Crick HQP, Robinson RA. Potential effects of climate change on marine mammals. *Oceanogr Mar Biol.* 2006; 44: 431.
17. Taylor BL, Baird R, Barlow J, Dawson SM, Ford J, Mead JG et al. The IUCN Red List of Threatened Species. 2008. Version 2015.1. Dataset accessed 2015-06-01 at: <http://www.iucnredlist.org>.
18. Hoydal K, Lastein L. Analysis of Faroese catches of pilot whales (1709–1992), in relation to environmental variations. *Reports of the International Whaling Commission* 1993; 14, 391–406.
19. Gowans S, Whitehead H. Distribution and habitat partitioning by small odontocetes in the Gully, a submarine canyon on the Scotian shelf. *Can J Zool* 1995; 73: 1599–1608.
20. Fullard KJ, Early G, Jorgensen MP, Bloch D, Rosing-Asvid A, Amos W. Population structure of long-finned pilot whales in North Atlantic: a correlation with sea surface temperature? *Mol Ecol.* 2000; 9: 949–958. PMID: [10886657](https://pubmed.ncbi.nlm.nih.gov/10886657/)
21. Hátún H, Payne MR, Beaugrand G, Reid PC, Sandø AB, Drange H, Bloch D. Large bio-geographical shifts in the north-eastern Atlantic Ocean: From the subpolar gyre, via plankton, to blue whiting and pilot whales. *Prog Oceanogr.* 2009; 80(3): 149–162.
22. Bloch D, Larstein L. Modeling the school structure of pilot whales in the Faroe Islands, 1832–1994. In: Blix A. S., Wallace L. and Ultang U. (eds), *Whales, Seals, Fish and Man*, Elsevier, Amsterdam, 499–508. 1995.
23. Bloch D. A review of marine mammals observed, caught, or stranded over the last two centuries in Faroese Waters. *Shetland Sea Mammal Report* 1997: 15–37. 1998.
24. Shane SH. Occurrence and habitat use of marine mammals at Santa Catalina Island, California from 1983–91. *Bull South Calif Acad Sci.* 1994; 93: 13–29.
25. Learmonth JA, MacLeod CD, Santos MB, Pierce GJ, Crick HQP, Robinson RA. Potential effects of climate change on marine mammals. *Oceanogr Mar Biol.* 2006; 44: 431.
26. Kasuya T, Miyashita T, Kasamatsu F. Segregation of two forms of short-finned pilot whales off the Pacific coast of Japan. *Scientific report of the Whales Research Institute* 1988; 39, 77–90.
27. Payne PM, Heinemann DW. The distribution of pilot whales (*Globicephala* spp.) in the shelf/shelf-edge and slope waters of the North-eastern United States. *Reports of the International Whaling Commission* 1993; 14: 51–68.
28. Bjørge A. How persistent are marine mammal habitats in an ocean of variability? In *Marine Mammals: Biology and Conservation*, Evans P.G.H. & Raga J.A. (eds). New York: Kluwer Academic/Plenum Publishers, 63–91. 2002.
29. Miralles L, Lens S, Rodríguez-Folgar A, Carrillo M, Martín V, Mikkelsen B et al. Interspecific Introgression in Cetaceans: DNA Markers Reveal Post-F1 Status of a Pilot Whale. *PLoS ONE.* 2013; 8(8): e69511. doi: [10.1371/journal.pone.0069511](https://doi.org/10.1371/journal.pone.0069511) PMID: [23990883](https://pubmed.ncbi.nlm.nih.gov/23990883/)
30. Bloch D, Lastein L. Morphometric segregation of long-finned pilot whales in eastern and western North Atlantic. *Ophelia.* 1993; 38: 55–68.
31. Hansen J, Ruedy R, Sato M, Lo K. Global surface temperature change. *Rev Geophys.* 2010; 48: RG4004.
32. GISTEMP. GISS Surface Temperature Analysis. NASA Goddard Institute for Space Studies. 2015. Dataset accessed 2015-06-01 at <http://data.giss.nasa.gov/gistemp/>.
33. Desportes G, Saboureaux M, Lacroix A. Reproductive maturity and seasonality of male long-finned pilot whales, off the Faroe Islands. *Report of the International Whaling Commission* 1993; 14: 233–262.
34. Martin AR, Rothery P. Reproductive parameters of female long-finned pilot whales (*Globicephala melas*) around the Faroe Islands. *European Research on Cetaceans.*



35. Dombrowski C. *Globicephala macrorhynchus*. Animal Diversity Web. 2012. Accessed June 11, 2015 at [http://animaldiversity.org/accounts/Globicephala\\_macrorhynchus/](http://animaldiversity.org/accounts/Globicephala_macrorhynchus/)
36. Marcott SA, Shakun JD, Clark PU, Mix AC. A reconstruction of regional and global temperature for the past 11,300 years. *Science*. 2013; 339(6124): 1198–1201. doi: [10.1126/science.1228026](https://doi.org/10.1126/science.1228026) PMID: [23471405](https://pubmed.ncbi.nlm.nih.gov/23471405/)
37. Müller PJ, Kirst G, Ruthland G, von Storch I, Rosell-Melé A. Calibration of the alkenone paleotemperature index UK'37 based on core-tops from the eastern South Atlantic and the global ocean (60N-60S). *Geochimica et Cosmochimica Acta* 62, 1757 (1998).
38. Marchal O, Cacho I, Stocker TF, Grimalt JO, Calvo E, Martrat B et al. Apparent long-term cooling of the sea surface in the northeast Atlantic and Mediterranean during the Holocene. *Quaternary Sci Rev*. 2002; 21: 455.
39. Estoup A, Largiadere CR, Perrot E, Chourrout D. Rapid one-tube DNA extraction protocol for reliable PCR detection of fish polymorphic markers and transgenes. *Mol Mar Biol Biotech*. 1996; 5(4): 295–298.
40. Thompson JD, Higgins DG, Gibson TJ. ClustalW: improving the sensitivity of progressive multiple sequence alignment through sequence weighting, position-specific gap penalties and weight matrix choice. *Nucleic Acids Res*. 1994; 22: 4673–4680. PMID: [7984417](https://pubmed.ncbi.nlm.nih.gov/7984417/)
41. Hall TA. BioEdit: a user-friendly biological sequence alignment editor and analysis program for Windows. *Nucl Acid Symp Ser*. 1999; 41: 95–98.
42. Altschul SF, Gish W, Miller W, Myers EW, Lipman DJ. Basic local alignment search tool. *J Mol Biol*. 1990; 215: 403–410. PMID: [2231712](https://pubmed.ncbi.nlm.nih.gov/2231712/)
43. Librado P, Rozas J. DnaSP v5: A software for comprehensive analysis of DNA polymorphism data. *Bioinformatics*. 2009; 25: 1451–1452. doi: [10.1093/bioinformatics/btp187](https://doi.org/10.1093/bioinformatics/btp187) PMID: [19346325](https://pubmed.ncbi.nlm.nih.gov/19346325/)
44. Bandelt HJ, Foster P, Rohlf A. Median-joining networks for inferring intraspecific phylogenies. *Mol Biol Evol*. 1999; 16: 37–48. PMID: [10331250](https://pubmed.ncbi.nlm.nih.gov/10331250/)
45. Network 4.5.1.6 (<http://fluxus-engineering.com>) Last Access: 04/2014
46. Allentoft ME, Oskam C, Houston J et al. Profiling the Dead: Generating Microsatellite Data from Fossil Bones of Extinct Megafauna—Protocols, Problems, and Prospects. *PLoS ONE*. 2011; 6(1): 16670.
47. Van Oosterhout C, Hutchinson WF, Wills DP, Shipley P. MICRO-CHECKER: software for identifying and correcting genotyping errors in microsatellite data. *Mol Ecol Notes*. 2004; 4: 535–538.
48. Nishida S, Goto M, Pastene LA, Kanda N, Koike H. Phylogenetic relationships among cetaceans revealed by Y-chromosome sequences. *Zool Sci*. 2007; 24: 723–732. PMID: [17824780](https://pubmed.ncbi.nlm.nih.gov/17824780/)
49. Raymond M, Rousset F. GENEPOP (version 1.2) population genetics software for exact test and ecumenicism. *J Hered*. 1995; 86: 248–249.
50. Belkhir K, Borsa P, Chikhi L, Raufaste N, Bonhomme F. GENETIX, logiciel sous Windows™ pour la génétique des populations. Montpellier: Université de Montpellier II, 45pp. 2001.
51. Goudet J. FSTAT, a program to estimate and test gene diversities and fixation indices (version 2.9.3). 2001. Data accessed 04/2014 at: <http://www.unil.ch/izea/software/fstat.html>.
52. Excoffier L, Laval G, Schneider S. Arlequin ver. 3.0: an integrated software package for population genetics data analysis. *Evol Bioinform Online*. 2005; 1: 47–50.
53. Cornuet JM, Luikart G. Description and power analysis of two test for detecting recent population bottlenecks from allele frequency data. *Genetics*. 1997; 144: 2001–2014.
54. Drummond AJ, Rambaut A. BEAST: Bayesian evolutionary analysis by sampling trees. *BMC Evol Biol* 2007; 7: 214 PMID: [17996036](https://pubmed.ncbi.nlm.nih.gov/17996036/)
55. Hoelzel AR, Hancock JM, Dover GA. Evolution of the cetacean mitochondrial D-loop region. *Mol Biol Evol*. 1991; 8: 475–493. PMID: [1717809](https://pubmed.ncbi.nlm.nih.gov/1717809/)
56. Hoelzel AR, Hey J, Dahlheim E et al. Evolution of population structure in a highly social top predator, the killer whale. *Mol Biol Evol*. 2007; 24 (6): 1407–1415. PMID: [17400573](https://pubmed.ncbi.nlm.nih.gov/17400573/)
57. Baker CS, Perry A, Bannister JL et al. Abundant mitochondrial DNA variation and world-wide population structure in humpback whales. *Proc Natl Acad Sci USA*. 1993; 90: 8239–8243. PMID: [8367488](https://pubmed.ncbi.nlm.nih.gov/8367488/)
58. Kingman JFC. The coalescent. *Stoch Process Their Appl*. 1982; 13: 235–248.
59. Posada D. Selection of models of DNA evolution with jModelTest. *Bioinformatics for DNA Sequence Analysis Methods in Molecular Biology* 2009; 537: 93–112. doi: [10.1007/978-1-59745-251-9\\_5](https://doi.org/10.1007/978-1-59745-251-9_5) PMID: [19378141](https://pubmed.ncbi.nlm.nih.gov/19378141/)
60. Akaike H. A new look at the statistical model identification. *IEEE Trans Automat Contr*. 1974; 16: 716–723.

61. Pritchard JK, Stephens M, Donnelly P. Inference of population structure using multilocus genotype data. *Genetics*. 2000; 155: 945–959. PMID: [10835412](#)
62. Anderson EC, Thompson EA. A model-based method for identifying species hybrids using multilocus genetic data. *Genetics*. 2002; 160: 1217–1229. PMID: [11901135](#)
63. Beerli P. Effect of unsampled populations on the estimation of population sizes and migration rates between sampled populations. *Mol Ecol*. 2004; 13(4): 827–836. PMID: [15012758](#)
64. Beerli P, Felsenstein J. Maximum likelihood estimation of a migration matrix and effective population sizes in subpopulations by using a coalescent approach. *Proc Natl Acad Sci USA*. 2001; 98(8): 4563–4568. PMID: [11287657](#)
65. Wright S. The genetical structure of populations. *Annual Eugenics*. 1951; 15: 323–354.
66. Lavery S, Moritz C, Fielder DR. Genetic patterns suggest exponential population growth in a declining species. *Mol Biol Evol*. 1996; 13: 1106–1113.
67. MacLeod CD, Bannon SM, Pierce GJ, Schweder CS, Learmonth JA, Herman JS, Reid RJ. Climate change and the cetacean community of north-west Scotland. *Biol Conserv*. 2005; 124: 477–483.
68. Bloch D, Lockyer C, Zachariassen M. Age and growth parameters of the long-finned pilot whale off the Faroe Islands. *Rep. Int. Whal. Comm.* 1993; 14: 163–207.
69. Nores C, Pérez C. Overlapping range between *Globicephala macrorhynchus* and *Globicephala melana* in the northeastern Atlantic. *Mammalia*. 1988; 52(1): 51–55.
70. Culik B. Odontocetes. The toothed whales. UNEP/CMS Secretariat, Bonn, Germany. <http://www.cms.int/small-cetaceans>. 2010.
71. Alfonsi E, Méheust E, Fuchs S, Carpentier FG, Quillivic Y, Viricel A et al. The use of DNA barcoding to monitor the marine mammal biodiversity along the French Atlantic coast. *Zookeys* 2013; 365: 5–24. doi: [10.3897/zookeys.365.5873](#) PMID: [24453548](#)
72. Sabatier E, Pante E, Dussud C, Canneyt OV, Simon-Bouhet B, Viricel A. Genetic monitoring of Pilot Whales *Globicephala* spp. (Cetacea: Delphinidae), stranded on French coasts. *Mammalia*. 2014; 79: 111–114.
73. Sergeant DE. The biology of the pilot or pothead whale (*Globicephala melana* (Traill) in Newfoundland waters. *B Fish Res Board Can*. 1962; 132: 1–84
74. Alves F, Querouil S, Denis A, Nicolau C, Ribeiro C, Freitas L et al. Population structure of short-finned pilot whales in the oceanic archipelago of Madeira based on photo-identification and genetic analyses: implications for conservation. *Aquat Conserv*. 2013; 23: 758–776.
75. Amos B, Barrett J, Dover GA. Breeding behavior of pilot whales revealed by DNA fingerprinting. *Heredity*. 1991; 67: 49–55. PMID: [1917551](#)
76. Palumbi SR. Genetic Divergence, Reproductive Isolation, and Marine Speciation. *Annu Rev Ecol Evol Syst*. 1994; 25: 547–572.
77. Mallet J. Hybridization as an invasion of the genome. *Trends Ecol Evol*. 2005; 20(5): 229–237. PMID: [16701374](#)
78. Seehausen O, Takimoto G, Roy D, Jokela J. Speciation reversal and biodiversity dynamics with hybridization in changing environments. *Mol Ecol*. 2008; 17: 30–44. PMID: [18034800](#)
79. Arnold ML. *Natural Hybridization and Evolution*. Oxford: Oxford University Press. Oxford. UK. 1997.
80. Whitehead H. Genetic diversity in matrilineal whales: models of cultural hitchhiking and group-specific nonheritable demographic variation. *Mar Mamm Sci*. 2005; 21: 58–79.
81. Alexander AM. 'Oh mother, when art thou?' Low mtDNA diversity in long-finned pilot whales (*Globicephala melas*). MSc Thesis, 2006. University of Auckland.
82. Maynard-Smith J, Haigh J. The hitch-hiking effect of a favourable gene. *Genetic Res*. 1974; 23: 23–35.
83. Steig EJ. Mid-Holocene climate change. *Science*. 1999; 286(5444): 1485–1487.
84. Kasuya T. Past occurrence of *Globicephala melana* in the western North Pacific. Scientific report of the Whales Research Institute 1975; 27: 95–110.
85. Frey A, Crockford SJ, Meyer M, O'Corry-Crowe GM. Genetic analysis of prehistoric marine mammal bones from an ancient Aleut village in the southeastern Bering Sea. 16th Biennial Conference on the Biology of Marine Mammals. San Diego, California. 2005.
